# Supplementary material
Source: Research Square preprint supplement (doi:10.21203/rs.3.rs-9620209/v1)
Supplement: Supplementary file 1 [file e68df7c7f72095e3584d681a.docx]

Table 1. Patient characteristics

| **Characteristics** | **All patients (n=287)** | **Intermediate-risk (n=59)** | **High-risk**  **(n=228)** |
| --- | --- | --- | --- |
| **Age (years)**  Mean (range) | 72.2 (46–85) | 70.0 (47–85) | 72.4 (46–85) |
| **PSA at diagnosis (ng/mL)**  Median (range) | 23.7 (1.4–517) | 9.4 (1.7–18) | 27.5 (1.4–517) |
| **ISUP grade group, n (%)** |  |  |  |
| Grade 1 | 1 (0.3) | 0 (0) | 1 (0.4) |
| Grade 2 | 34 (11.8) | 22 (37.3) | 12 (5.3) |
| Grade 3 | 51 (17.8) | 37 (62.7) | 14 (6.1) |
| Grade 4 | 51 (17.8) |  | 51 (22.4) |
| Grade 5 | 150 (52.3) |  | 150 (65.8) |

Table 2. Imaging findings

| **Imaging findings** | **All patients**  **n (%)** | **Intermediate-risk**  **n (%)** | **High-risk**  **n (%)** |
| --- | --- | --- | --- |
| Negative PSMA-PET/CT and negative BS/CT | 187 (65.2) | 46 (78.0) | 141 (61.8) |
| Negative PSMA-PET/CT but positive BS/CT | 6 (2.1) | 0 (0) | 6 (2.6) |
| Positive PSMA-PET/CT and positive BS/CT | 44 (15.3) | 3 (5.1) | 41 (18.0) |
| Positive PSMA-PET/CT but negative BS/CT | 50 (17.4) | 10 (16.9) | 40 (17.5) |

Table 3. Impact on clinical management

| **Management outcome** | **All patients**  **n (%)** | **Intermediate-risk**  **n (%)** | **High-risk**  **n (%)** |
| --- | --- | --- | --- |
| No change in management | 222 (77.4) | 50 (84.7) | 172 (75.4) |
| Minor change | 6 (2.1) | 2 (3.4) | 4 (1.8) |
| Medium change | 28 (9.8) | 3 (5.1) | 25 (11.0) |
| Major change | 31 (10.8) | 4 (5.8) | 27 (11.8) |
| **Any management change** | **65 (22.6)** | **9 (15.3)** | **56 (24.6)** |

Table 4. Examples of management changes

| **Patient** | **Initial treatment** | **Post PET/CT treatment** | **Management change** | **Reason for management change** |
| --- | --- | --- | --- | --- |
| 1 | Prostatectomy | ADT+ARPI | Major | Several bone metastases on PET/CT |
| 2 | Curative radiation | ADT+ARPI+palliative radiation | Major | 7 lymph node metastases in the abdomen on PET/CT |
| 3 | Curative Radiation | Curative Radiation with radiation of iliac lymph nodes | Medium | 2 iliac lymph node metastases on PET/CT |
| 4 | Prostatectomy | Prostatectomy | Minor | Delayed operation due to investigation of miscellaneous uptake in bone on PET/CT |
